# Supplementary material for: Rate Pressure Products Affect the Relationship between the Fractional Flow Reserve and Instantaneous Wave-Free Ratio
Source: Hindawi journal article supplement (doi:10.1155/2020/6230153), 2020-07-22

Distribution of rate-pressure products

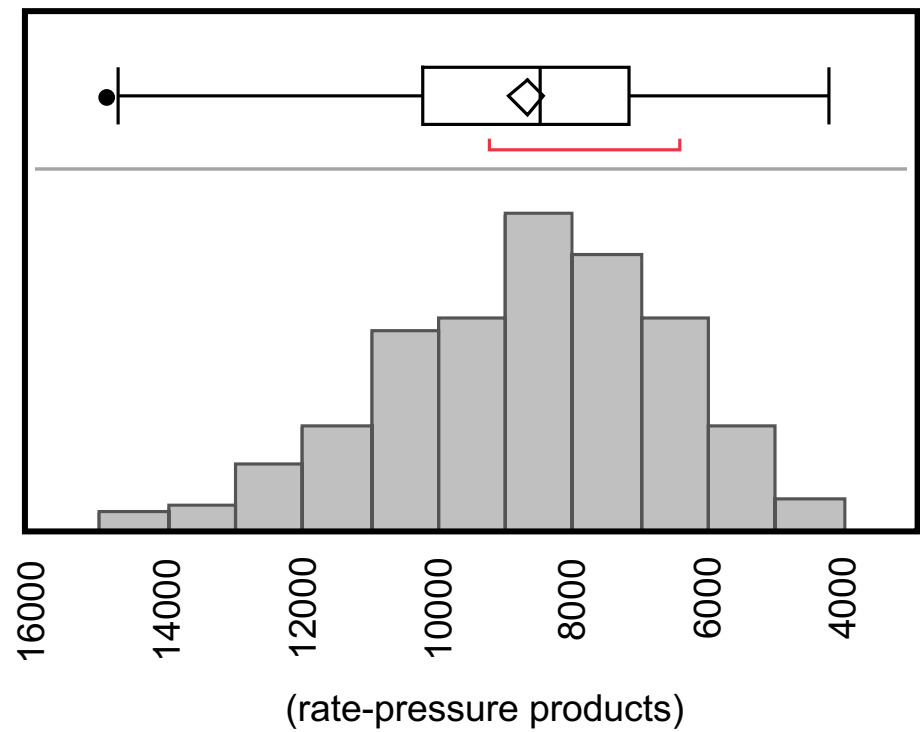

Supplement Figure 2

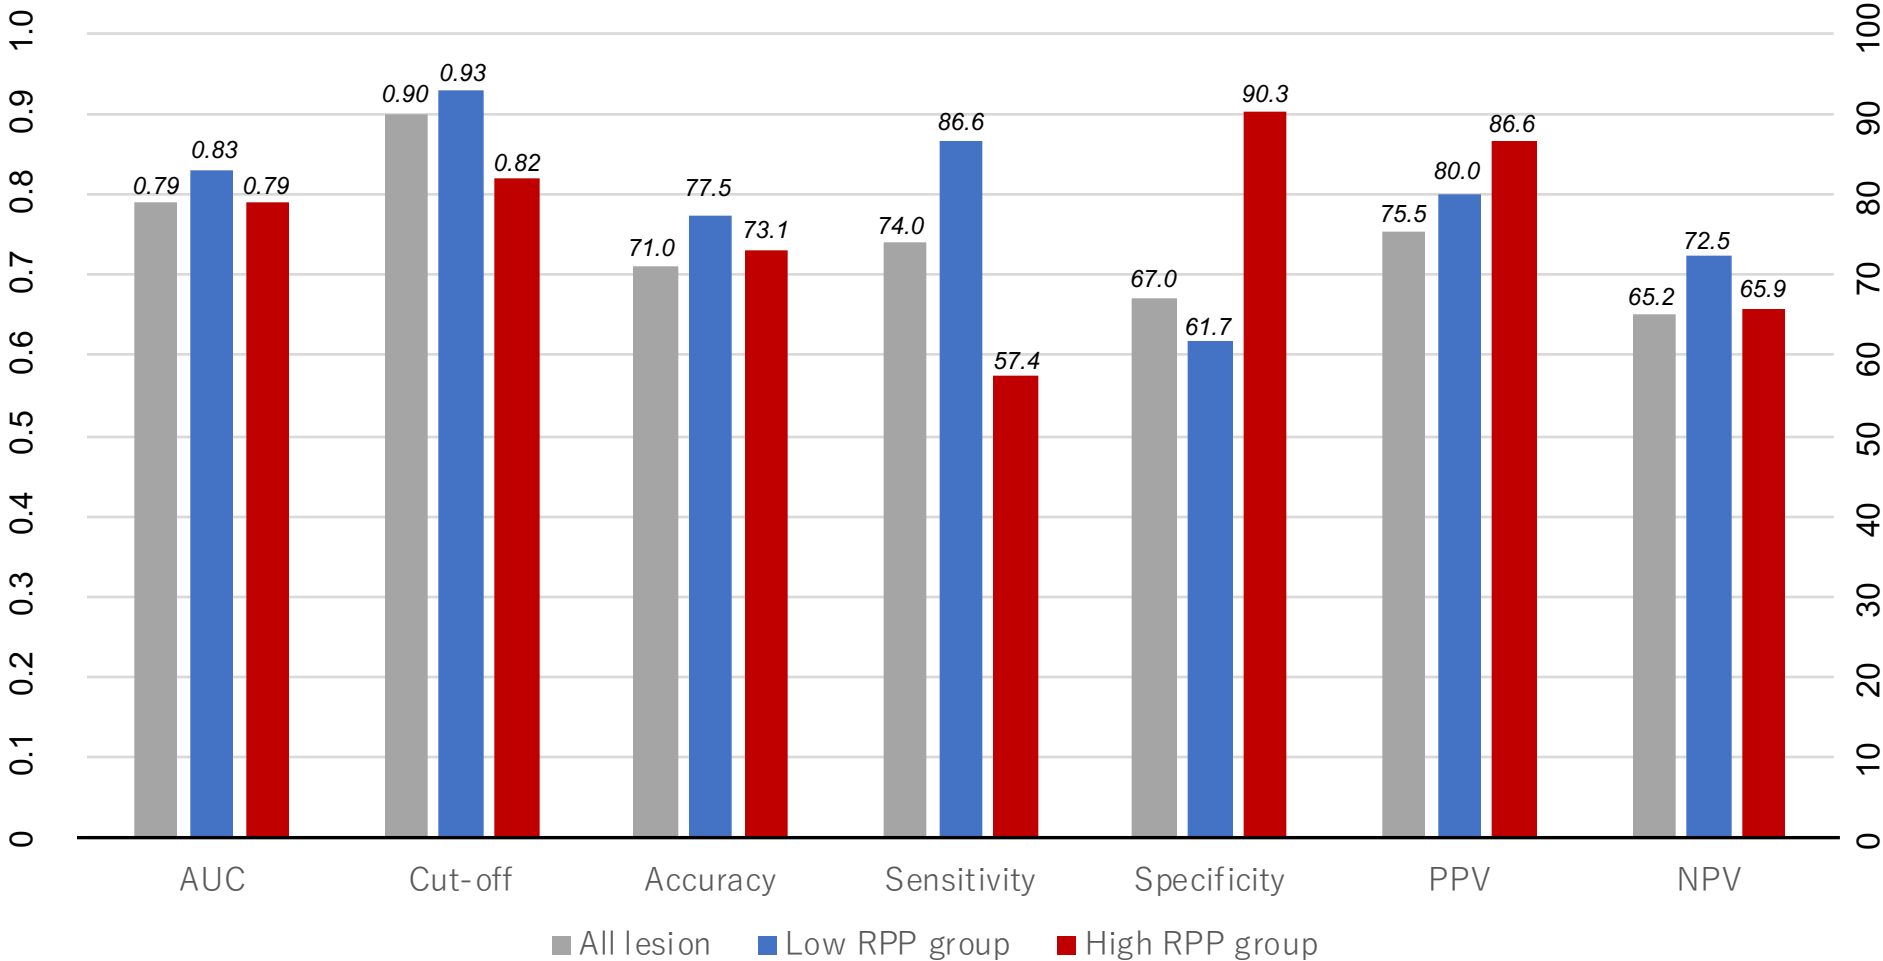

A) Low RPP group

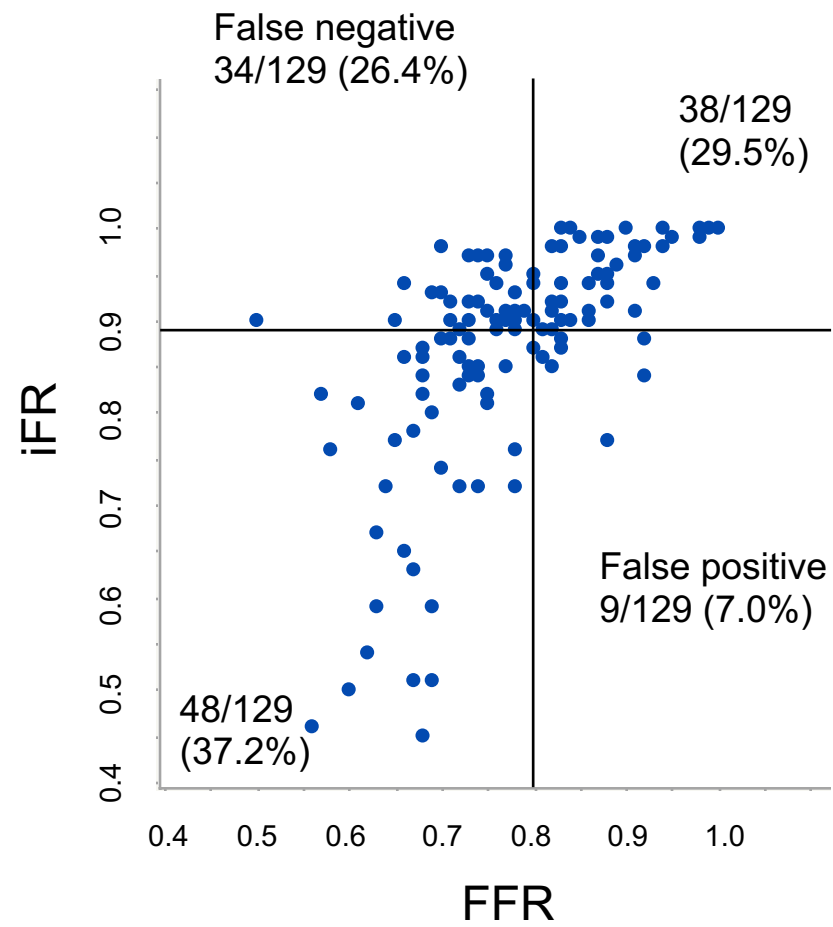

A) High RPP group

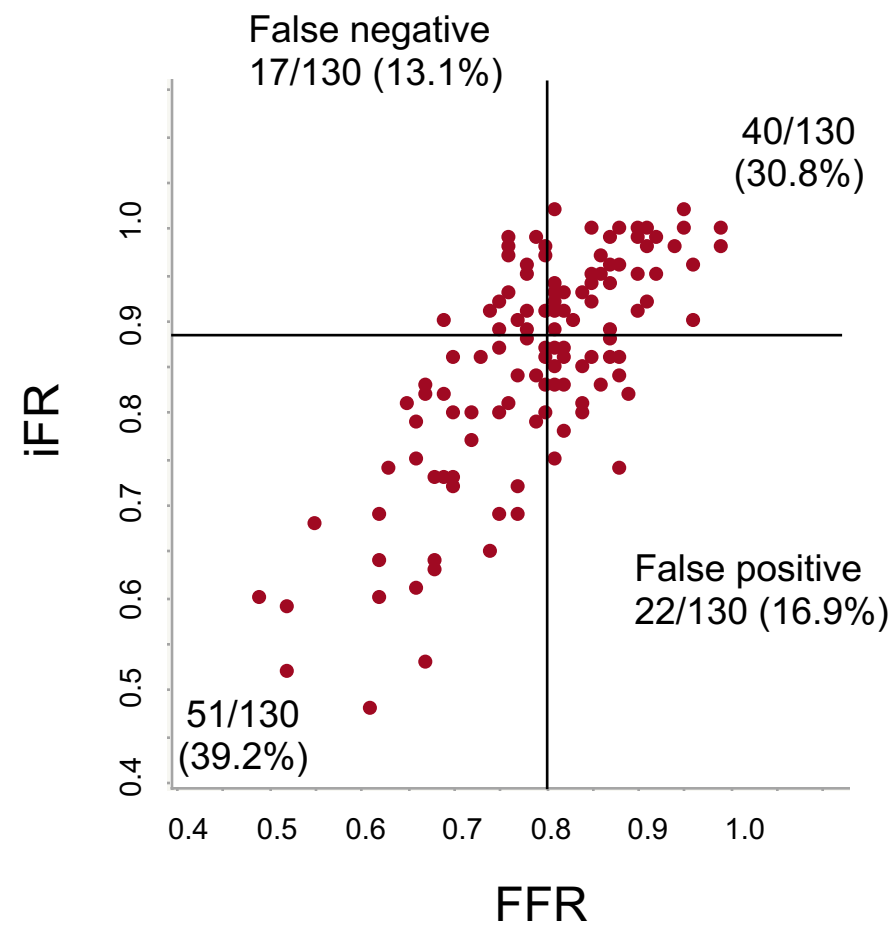

Supplement: f1 [file 6230153.f1.pdf]
